# Supplementary material for: Controllable synthesis of the defect-enriched MoO3−x nanosheets as an effective visible-light photocatalyst for the degradation of organic dyes
Source: Royal Society of Chemistry journal article supplement (doi:10.1039/d1en00210d), 2021-01-01
Supplement: d1en00210d1.pdf [file d1en00210d1.pdf]

## Supporting Information

### Controllable synthesis of the defect-enriched MoO<sub>3-x</sub> nanosheets as an effective visible-light photocatalyst for the degradation of organic dyes

Yuqi Zhang<sup>a#</sup>, Xiang Yu<sup>a,b#</sup>, Huan Liu<sup>a</sup>, Xinyi Lian<sup>a</sup>, Bin Shang<sup>a</sup>, Yue Zhan<sup>a</sup>, Tingting Fan<sup>a</sup>, Zhou Chen<sup>a\*</sup> and Xiaodong Yi<sup>a\*</sup>

a. College of Chemistry and Chemical Engineering, College of Materials, Xiamen University, Xiamen 361005, P. R. China.

b. Inorganic Chemistry and Catalysis Group, Debye Institute for Nanomaterials Science, Utrecht University, Utrecht, The Netherlands.

**\*Corresponding authors:**

xdyi@xmu.edu.cn (X. D. Yi), zhouchen@xmu.edu.cn (Z. Chen).

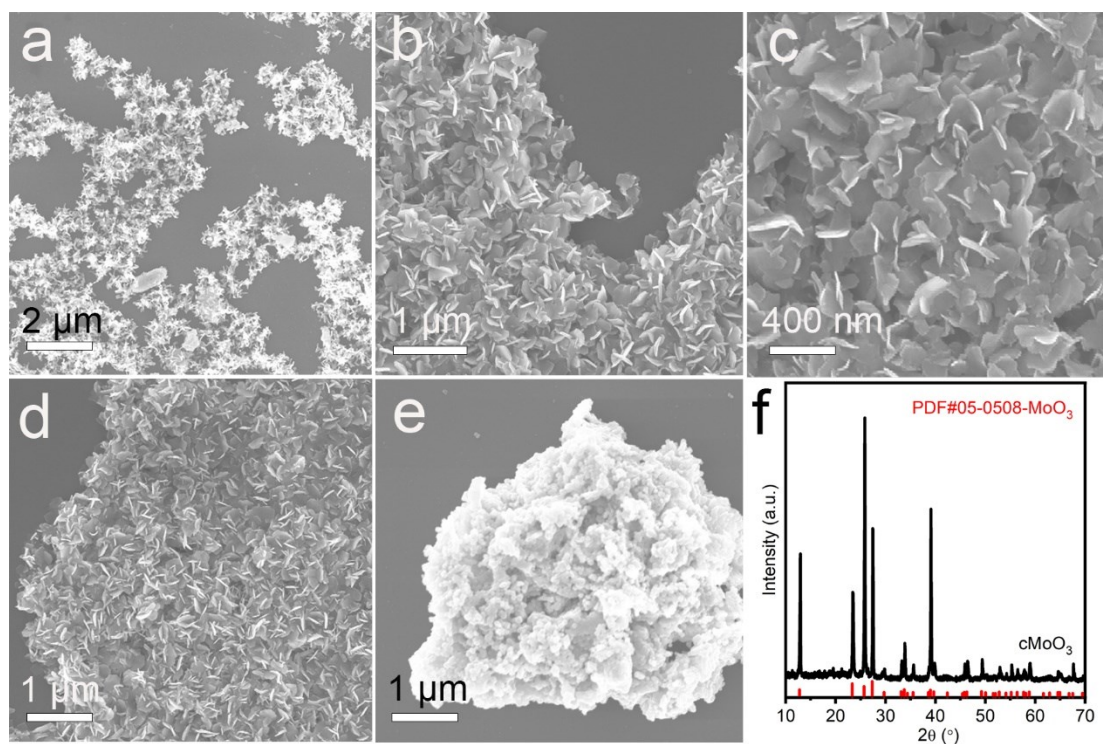

**Fig. S1.** Morphology analysis of MoO<sub>3-x</sub> nanosheets. The SEM images of (a) MoO<sub>3-x-2</sub>, (b) MoO<sub>3-x-4</sub>, (c) MoO<sub>3-x-8</sub>, (d) MoO<sub>3-x-12</sub> and (e) cMoO<sub>3</sub>; (f) XRD pattern of cMoO<sub>3</sub>.

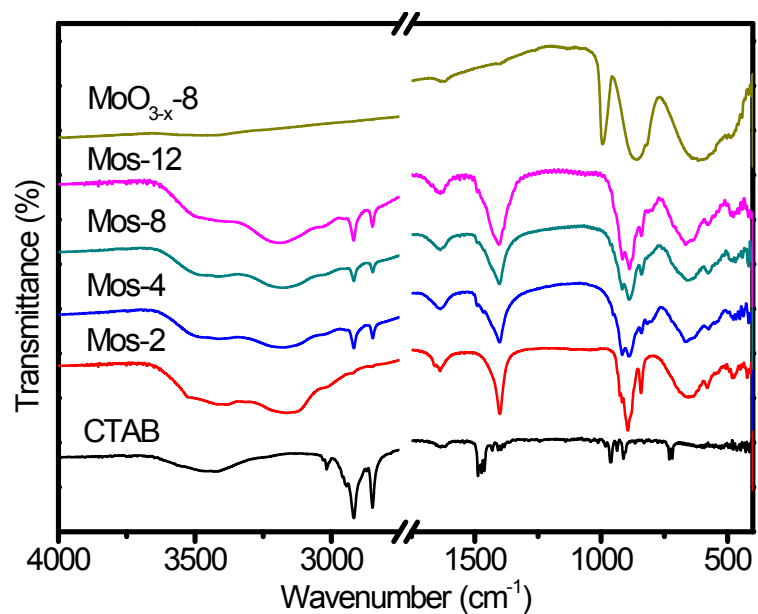

**Fig. S2.** FTIR spectra of ammonium molybdate nanosheets (Mos), CTAB and  $\text{MoO}_{3-x}-8$ . The Mos-a are the samples collected before thermal treatment (“a” equals 2, 4, 8 and 12).

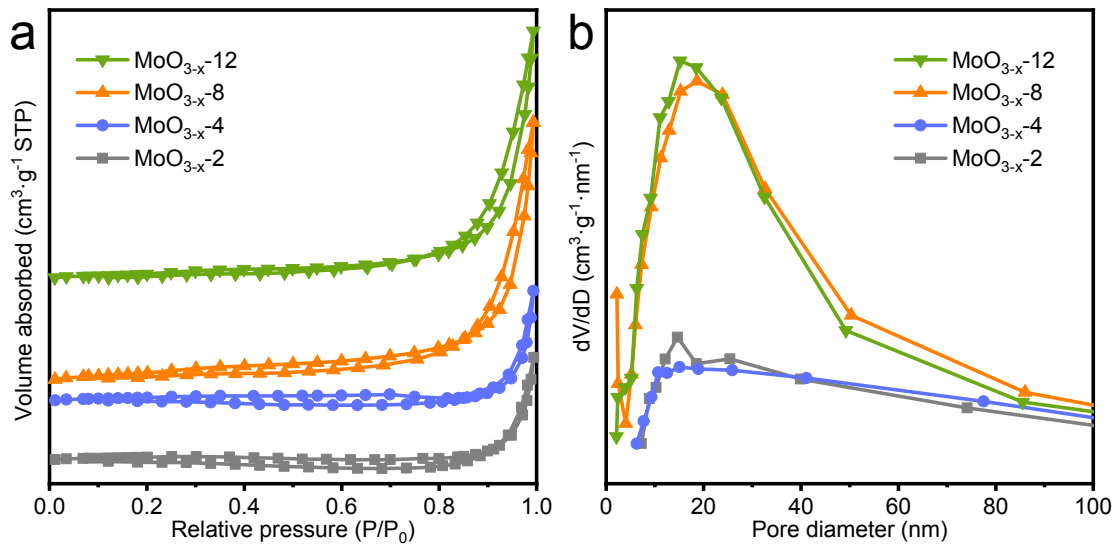

**Fig. S3.** (a) Nitrogen adsorption-desorption isotherms (b) BJH pore size distribution curves of MoO<sub>3-x</sub> nanosheets.

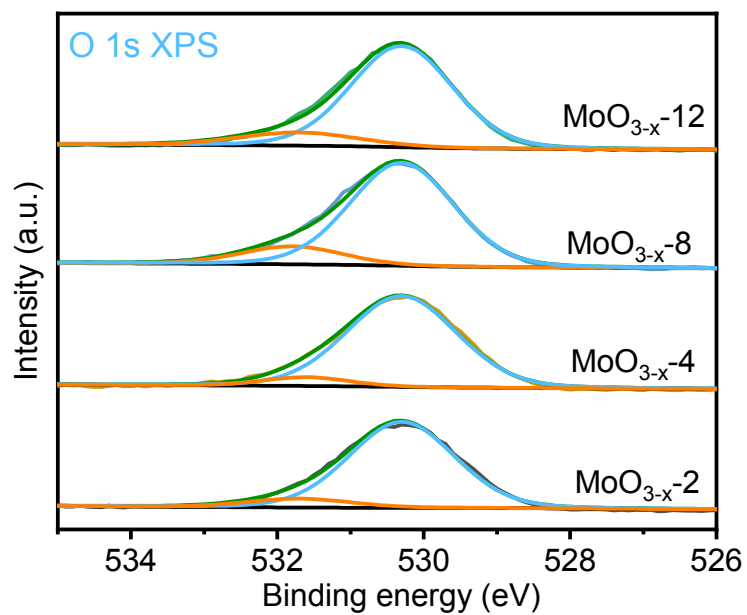

**Fig. S4.** The high resolution O 1s XPS spectra of MoO<sub>3-x</sub>-2, MoO<sub>3-x</sub>-4, MoO<sub>3-x</sub>-8 and MoO<sub>3-x</sub>-12.

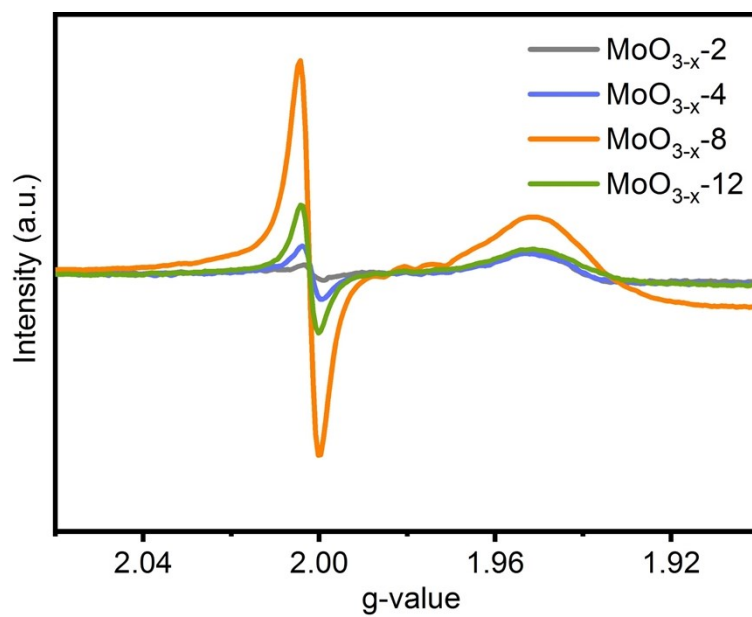

**Fig. S5.** ESR spectra of MoO<sub>3-x</sub>-2, MoO<sub>3-x</sub>-4, MoO<sub>3-x</sub>-8 and MoO<sub>3-x</sub>-12 (different batches of samples).

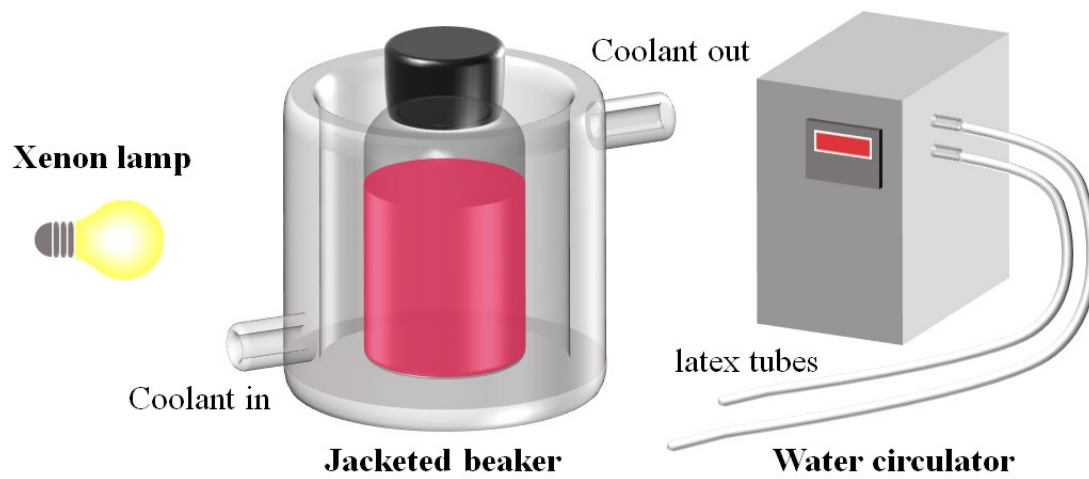

**Fig. S6.** The schematic diagram of the photocatalytic device.

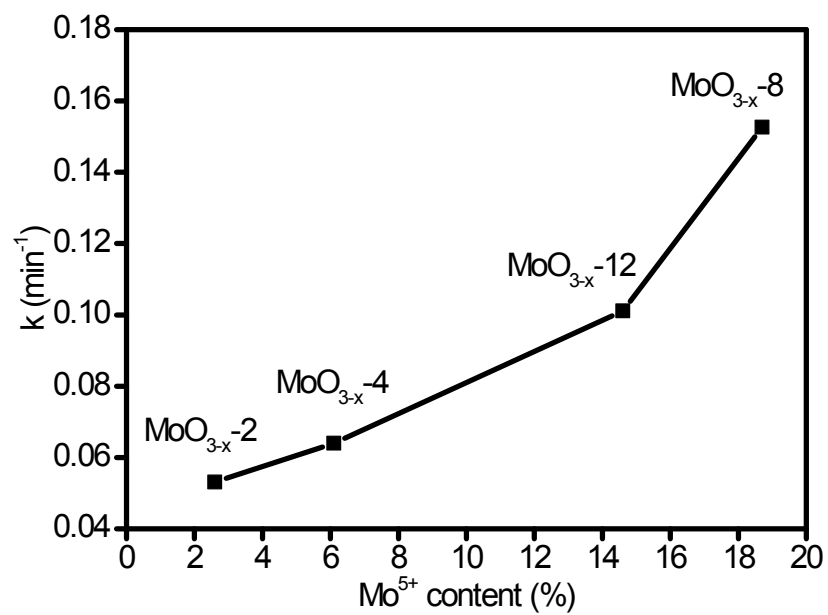

**Fig. S7.** The plots between Mo<sup>5+</sup> concentration and the rate constant of MoO<sub>3-x</sub> photocatalysts.



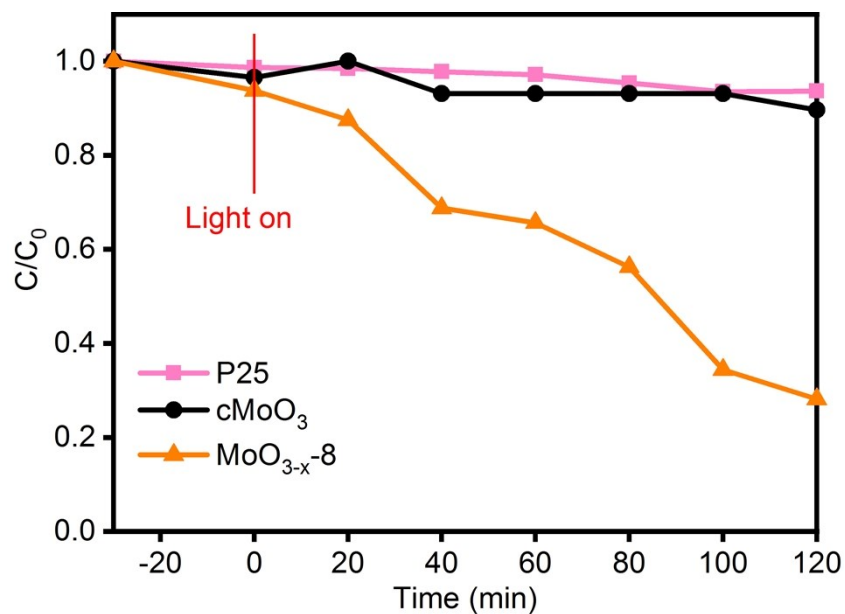

**Fig. S8.** The degradation of phenol over P25,  $c\text{MoO}_3$  and  $\text{MoO}_{3-x}$ -8 under visible light.

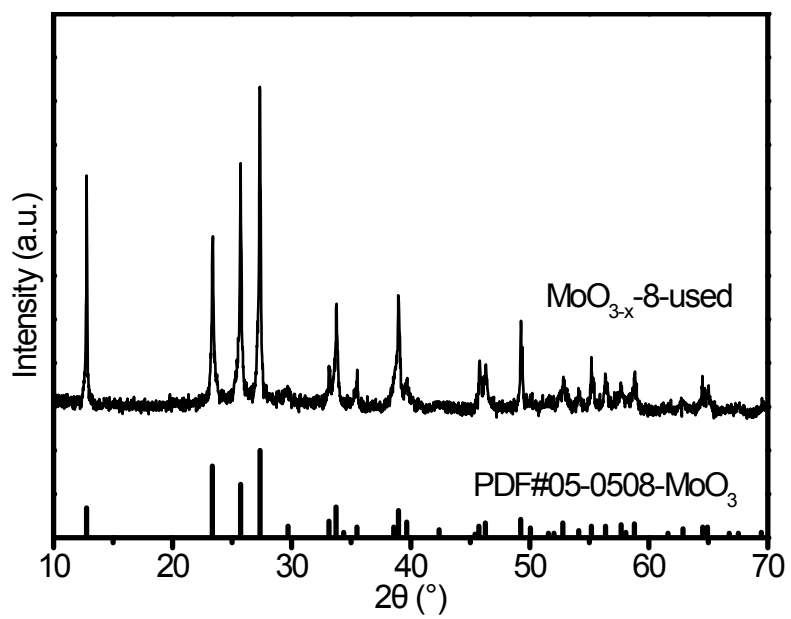

**Fig. S9.** The XRD pattern of the MoO<sub>3-x</sub>-8-used catalyst.

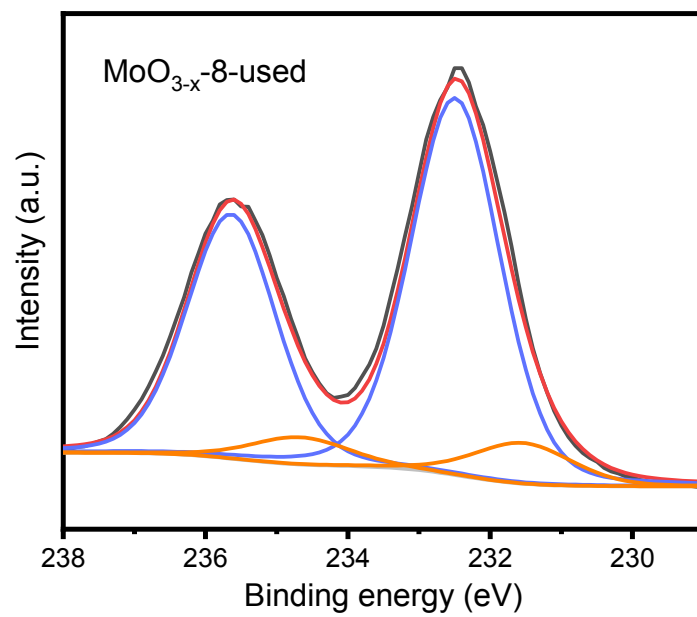

**Fig. S10.** The XPS of the MoO<sub>3-x</sub>-8-used catalyst.

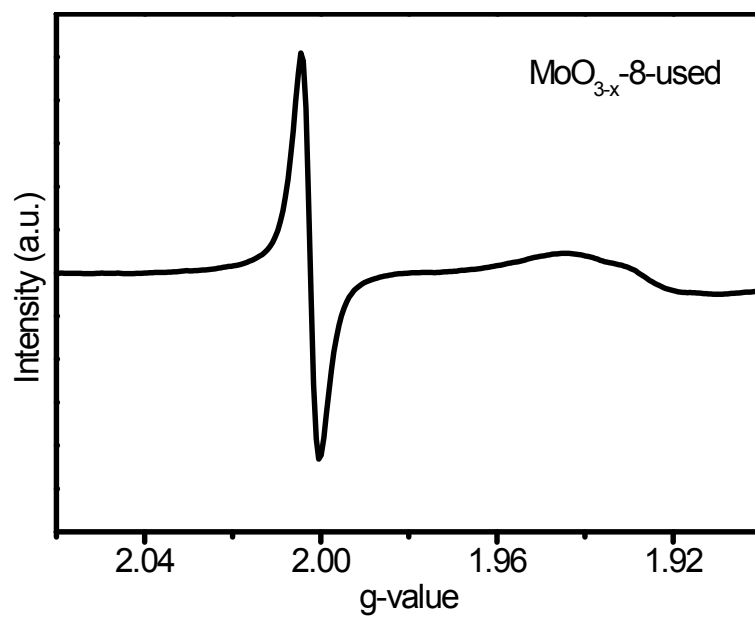

**Fig. S11.** The ESR of the  $\text{MoO}_{3-x}$ -8-used catalyst.

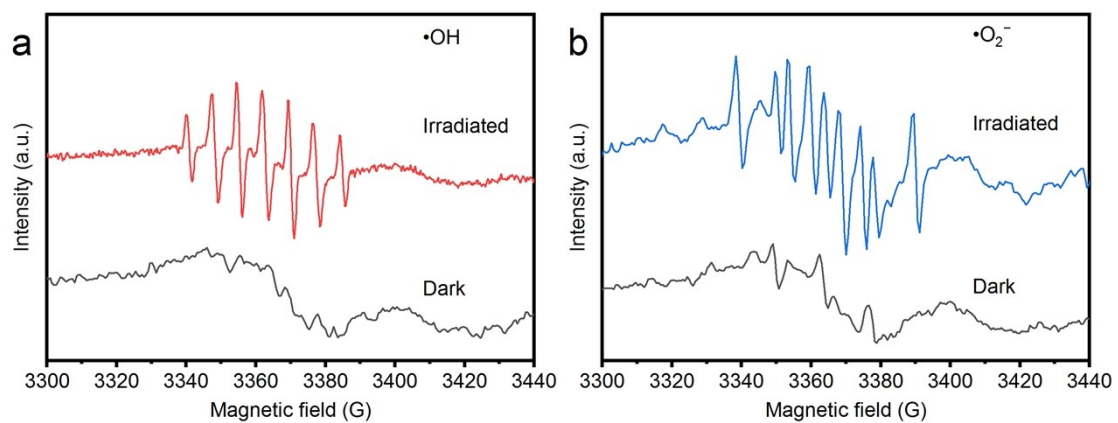

**Fig. S12.** ESR spectra of (a) DMPO-•OH and (b) DMPO-•O<sub>2</sub><sup>-</sup> adducts for MoO<sub>3-x</sub>-8 under visible-light irradiation.

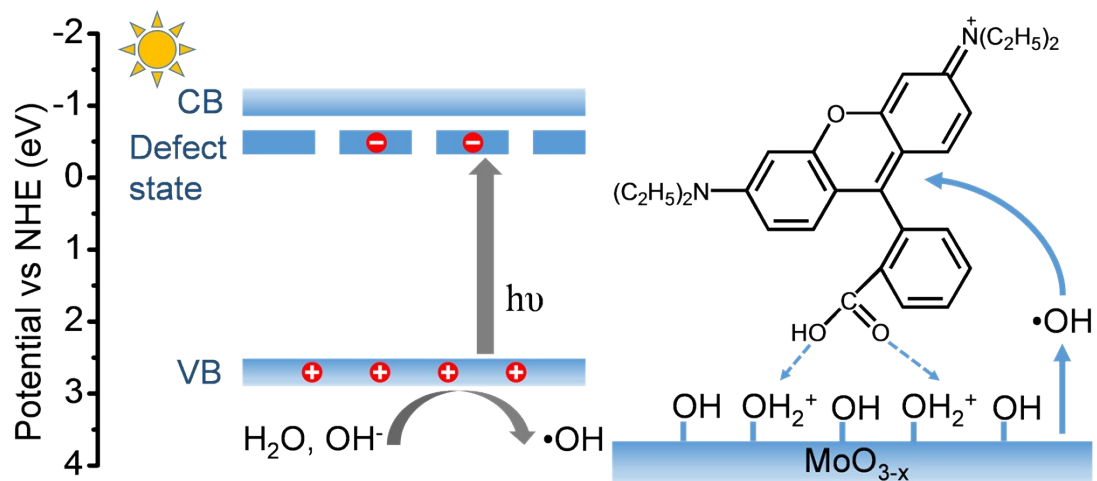

**Fig. S13.** The proposed band structure and the photodegradation mechanism of MoO<sub>3-x</sub> nanosheets.

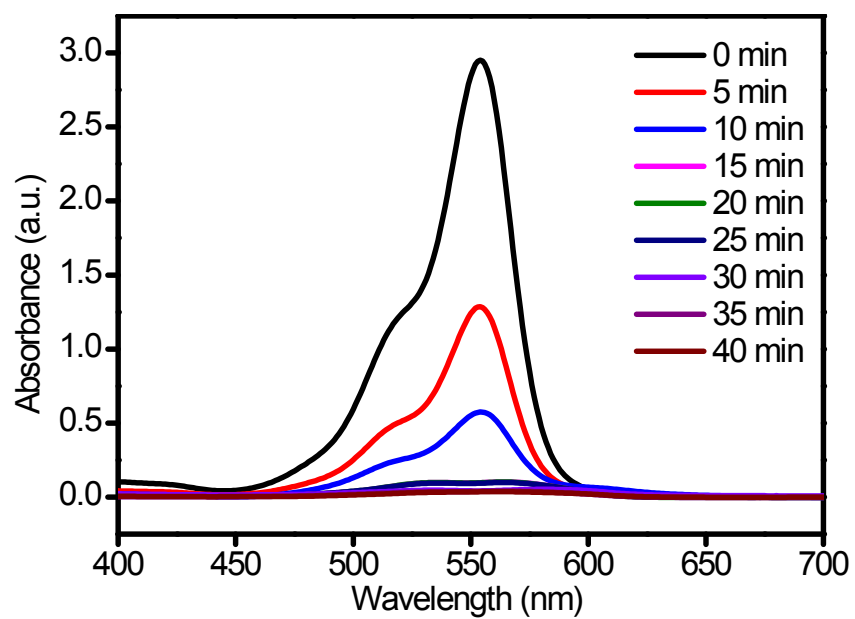

**Fig. S14.** UV-vis absorption spectra of RhB aqueous solution in the presence of MoO<sub>3-x</sub>-8 under visible-light irradiation.

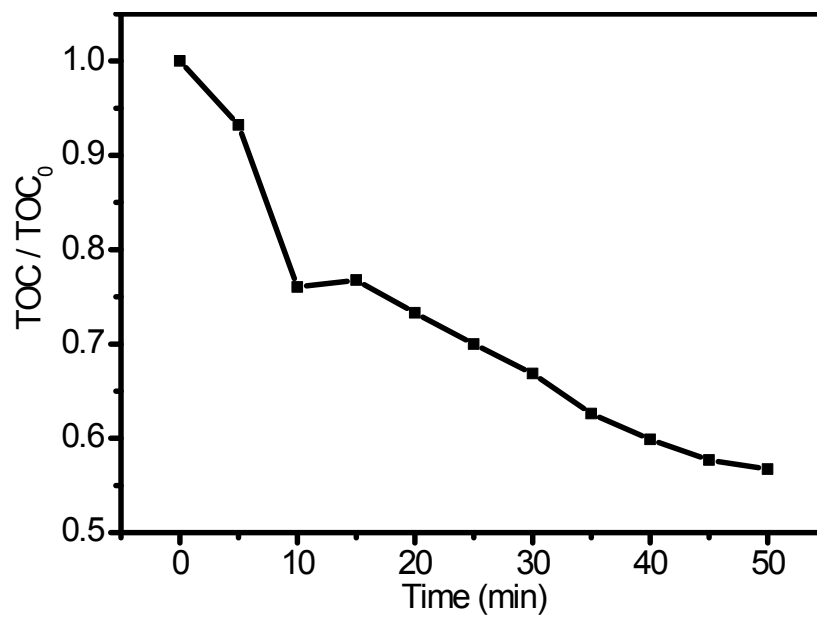

**Fig. S15.** TOC removal of the RhB solution by the MoO<sub>3-x</sub>-8 photocatalyst.



---

**Table S1.** BET specific surface areas, average pore volumes and pore sizes of MoO<sub>3-x</sub> samples.

| Samples                | BET surface area (m <sup>2</sup> /g) | Pore volume (cm <sup>3</sup> /g) | Pore size (nm) |
|------------------------|--------------------------------------|----------------------------------|----------------|
| MoO <sub>3-x</sub> -2  | 6.3                                  | 0.024                            | 37.2           |
| MoO <sub>3-x</sub> -4  | 5.7                                  | 0.025                            | 39.5           |
| MoO <sub>3-x</sub> -8  | 11.7                                 | 0.058                            | 25.1           |
| MoO <sub>3-x</sub> -12 | 10.1                                 | 0.056                            | 24.4           |

---

**Table S2.** The C, N and H composition of MoO<sub>3-x</sub>-2, MoO<sub>3-x</sub>-4, MoO<sub>3-x</sub>-8 and MoO<sub>3-x</sub>-12 determined by organic elemental analysis.

| Samples                | Content of element (wt. %) |     |     |
|------------------------|----------------------------|-----|-----|
|                        | C                          | N   | H   |
| MoO <sub>3-x</sub> -2  | 0.0                        | 0.0 | 1.0 |
| MoO <sub>3-x</sub> -4  | 0.0                        | 0.0 | 0.5 |
| MoO <sub>3-x</sub> -8  | 0.0                        | 0.0 | 0.7 |
| MoO <sub>3-x</sub> -12 | 0.1                        | 0.0 | 0.8 |

---

**Table S3.** The deconvolution results of Mo 3d XPS spectra of MoO<sub>3-x</sub>-2, MoO<sub>3-x</sub>-4, MoO<sub>3-x</sub>-8 and MoO<sub>3-x</sub>-12.

| Samples                | Atomic percentage (%) |                  | Mo:O   |
|------------------------|-----------------------|------------------|--------|
|                        | Mo <sup>5+</sup>      | Mo <sup>6+</sup> |        |
| MoO <sub>3-x</sub> -2  | 2.6                   | 97.4             | 1:2.99 |
| MoO <sub>3-x</sub> -4  | 6.1                   | 93.9             | 1:2.98 |
| MoO <sub>3-x</sub> -8  | 18.7                  | 81.3             | 1:2.93 |
| MoO <sub>3-x</sub> -12 | 14.6                  | 85.4             | 1:2.94 |

---

**Table S4.** The photocatalytic rates of MoO<sub>3-x</sub> samples expressed as reaction rate constant per unit BET surface area.

| Photocatalysts         | BET surface area (m <sup>2</sup> /g) | k (min <sup>-1</sup> ) | k' (min <sup>-1</sup> ·m <sup>-2</sup> ) |
|------------------------|--------------------------------------|------------------------|------------------------------------------|
| MoO <sub>3-x</sub> -2  | 6.3                                  | 0.0531                 | 0.0084                                   |
| MoO <sub>3-x</sub> -4  | 5.7                                  | 0.0640                 | 0.0112                                   |
| MoO <sub>3-x</sub> -8  | 11.7                                 | 0.1526                 | 0.0130                                   |
| MoO <sub>3-x</sub> -12 | 10.1                                 | 0.1011                 | 0.0100                                   |

**Table S5.** Recently published MoO<sub>3</sub> materials towards photocatalytic degradation RhB.

| Catalysts                                                    | C(cat.)<br>(g/L) | C(RhB)<br>(mg/L) | Light source                                  | Time<br>(min) | Degradation<br>rate (%) | Reference |
|--------------------------------------------------------------|------------------|------------------|-----------------------------------------------|---------------|-------------------------|-----------|
| MoO <sub>3-x</sub>                                           | 1.6              | 47.6             | 150W LED<br>lamp                              | 10            | 40                      | [1]       |
| AgBr/MoO <sub>3</sub>                                        | 0.2              | 10               | 250 W Xenon<br>lamp                           | 5             | 95                      | [2]       |
| MoO <sub>3-x</sub>                                           | 0.6              | 20               | 300W xenon<br>lamp ( $\lambda > 420$<br>nm )  | 90            | 81                      | [3]       |
| MoO <sub>2</sub> /MoO <sub>3</sub>                           | 0.1              | 10               | 250 W Xenon<br>lamp ( $\lambda > 400$<br>nm ) | 30            | 90                      | [4]       |
| dr-MoO <sub>3</sub>                                          | 0.3              | 21               | 350W xenon<br>lamp ( $\lambda > 400$<br>nm )  | 50            | 95                      | [5]       |
| MoO <sub>3</sub>                                             | 0.6              | 30               | 150 W halogen<br>lamp                         | 60            | 99                      | [6]       |
| MoO <sub>3</sub> -CdS                                        | 2                | 10               | 300W xenon<br>lamp ( $\lambda > 400$<br>nm )  | 180           | 97                      | [7]       |
| g-C <sub>3</sub> N <sub>4</sub> / $\alpha$ -MoO <sub>3</sub> | 0.3              | 10               | 250W xenon<br>lamp ( $\lambda > 400$<br>nm )  | 120           | 72                      | [8]       |
| BaTiO <sub>3</sub> /MoO <sub>3</sub>                         | -                | -                | 150 W halogen<br>lamp                         | 30            | 86                      | [9]       |
| MoO <sub>3-x</sub> -8                                        | 0.6              | 40               | 300W xenon<br>lamp ( $\lambda > 420$<br>nm )  | 15            | 95                      | This work |

---

## Reference

- [1] A.S. Etman, H.N. Abdelhamid, Y.Y. Yuan, L.G. Wang, X.D. Zou and J.L. Sun, Facile water-based strategy for synthesizing MoO<sub>3-x</sub> nanosheets: efficient visible light photocatalysts for dye degradation, ACS Omega, 2018, **3**, 2193-2201.
- [2] B. Feng, Z.Y. Wu, J.S. Liu, K.J. Zhu, Z.Q. Li, X. Jin, Y.D. Hou, Q.Y. Xi, M.Q. Cong, P.C. Liu and Q.L. Gu, Combination of ultrafast dye-sensitized-assisted electron transfer process and novel Z-scheme system: AgBr nanoparticles interspersed MoO<sub>3</sub> nanobelts for enhancing photocatalytic performance of RhB, Appl. Catal. B: Environ., 2017, **206**, 242-251.
- [3] Q.W. Liu, Y.W. We, J.W. Zhang, K.J. Chen, C.J. Huang, H. Chen and X.Q. Qiu, Plasmonic MoO<sub>3-x</sub> nanosheets with tunable oxygen vacancies as efficient visible light responsive photocatalyst, Appl. Surf. Sci., 2019, **490**, 395-402.
- [4] Q.Y. Xi, J.S. Liu, Z.Y. Wu, H.F. Bi, Z.Q. Li, K.J. Zhu, J.J. Zhuang, J.X. Chen, S.L. Lu, Y.F. Huang and G.M. Qian, In-situ fabrication of MoO<sub>3</sub> nanobelts decorated with MoO<sub>2</sub> nanoparticles and their enhanced photocatalytic performance, Appl. Surf. Sci., 2019, **480**, 427-437.
- [5] B.J. Zheng, Z.G. Wang, X.Q. Wang and Y.F. Chen, Enhanced photocatalytic properties of defect-rich  $\alpha$ -MoO<sub>3</sub> nanoflakes by cavitation and pitting effect, J. Hazard. Mater., 2019, **378**, 1-8.
- [6] Y. Liu, P.Z. Feng, Z. Wang, X.Y. Jiao and F. Novel fabrication and enhanced photocatalytic MB degradation of hierarchical porous monoliths of MoO<sub>3</sub>

---

nanoplates, Akhtar, Sci Rep, 2017, **7**, 1845.

[7] Z.Y. Shen, G. Chen, Y.G. Yu, Q. Wang, C. Zhou, L.X. Hao, Y.X. Li, L.M. He and R.D. Mu, Sonochemistry synthesis of nanocrystals embedded in a MoO<sub>3</sub>-CdS core-shell photocatalyst with enhanced hydrogen production and photodegradation, J. Mater. Chem., 2012, **22**, 19646-19651.

[8] X.N. Zhang, J.J. Yi, H.X. Chen, M. Mao, L. Liu, X.J. She, H.Y. Ji, X.Y. Wu, S.Q. Yuan, H. Xu and H.M. Li, J. Construction of a few-layer g-C<sub>3</sub>N<sub>4</sub>/α-MoO<sub>3</sub> nanoneedles all-solid-state Z-scheme photocatalytic system for photocatalytic degradation, Energy Chem., 2019, **29**, 65-71.

[9] K.V. Alex, A. Prabhakaran, A.R. Jayakrishnan, K. Kamakshi, J.P.B. Silva and K.C. Sekhar, Charge coupling enhanced photocatalytic activity of BaTiO<sub>3</sub>/MoO<sub>3</sub> heterostructures, ACS Appl. Mater. Interfaces, 2019, **11**, 40114-40124.
